# Supplementary material for: Methods for estimating uncertainty in factor analytic solutions
Source: Copernicus journal article supplement (doi:10.5194/amt-7-781-2014), 2014-03-27
Supplement: Supplementary file 1 [file amt-7-781-2014-supplement.pdf]

## Supplemental Material

### 1. Why DISP estimation requires that $dQ^{\max} \geq 4$ (One-dimensional case)

The Least Squares (LS) estimate of the expectation value  $E(x)$  of a scalar random variable  $x$  is simply the average of its  $n$  observations,  $\text{avg}(x_i)$ . It is assumed that  $x$  has a finite variance; standard deviation of  $x$  is denoted by  $\sigma$ .

The LS object function  $Q$ , as a function of a test value  $t$ , is defined by

$$Q(t) = \sum_{i=1}^n (t - x_i)^2 / \sigma^2 \quad (1)$$

The LS estimate  $\hat{x}$  of  $E(x)$  is that value of  $t$  that minimizes expression (1). It is seen that  $\hat{x} = \bar{x} = \text{avg}(x_i)$ . The following identity for  $Q$  is well known (“Steiner’s rule”):

$$\begin{aligned} Q(t) &= \sum_{i=1}^n (t - x_i)^2 / \sigma^2 \\ &= \sum_{i=1}^n (\bar{x} - x_i)^2 / \sigma^2 + n(t - \bar{x})^2 / \sigma^2 \\ &= Q^{\min} + dQ \end{aligned} \quad (2)$$

It follows that

$$\begin{aligned} Q(E(x)) &= Q^{\min} + dQ \\ &= Q^{\min} + n(E(x) - \bar{x})^2 / \sigma^2 \end{aligned} \quad (3)$$

Average of  $n$  observations has standard deviation =  $\sigma / \sqrt{n}$ . With sufficiently large  $n$ , the average is also approximately normally distributed. Thus

$$\text{prob}\left(|E(x) - \bar{x}| > 2\sigma / \sqrt{n}\right) \approx 0.05 \quad (4)$$

$$\text{prob}\left((E(x) - \bar{x})^2 > 4\sigma^2 / n\right) \approx 0.05 \quad (5)$$

$$\text{prob}(dQ > 4) \approx 0.05 \quad (6)$$

It is seen that for the one-dimensional case, constraining  $dQ$  to be less than 4 defines a 95% confidence interval for the true value.

## 2. Why DISP estimation requires that $dQ^{\max} \geq 4$ (The multivariate linear model)

The observations are now fitted by the equation

$$\mathbf{Xc} = \mathbf{b} = \mathbf{b}^0 + \mathbf{e} \quad (7)$$

where column vector  $\mathbf{c}$  is to be estimated. Column vector  $\mathbf{b}$  contains measured values. Vector  $\mathbf{b}^0$  represents the unknown true data values;  $\mathbf{e}$  contains measurement errors. It is assumed that  $\text{cov}(\mathbf{e}) = \mathbf{I}$ .

The multivariate case is reduced to one-dimensional cases by using the singular value decomposition  $\text{SVD}(\mathbf{X})$ . Singular components are statistically independent of each other; thus they may be estimated separately as a number of one-dimensional cases. In the direction of each singular component of  $\mathbf{c}$ , the 95% confidence interval is obtained from the constraint  $dQ < 4$ . Note that these are *not* joint confidence intervals.

This is not a complete analysis of the multivariate case. This analysis suffices to demonstrate that  $dQ$  limits smaller than 4 will not provide satisfactory confidence limits because the probability of the obtained interval not containing the true value will be too high. However, this analysis does *not* guarantee that the limit of 4 is sufficiently large for  $dQ$  in practical work.

## 3. Factor profiles for simulated datasets

Table S-1 provides the simulated data factor profiles.

Table S-1. Profiles for Factors Used in Simulation,  $\mu\text{g}/\text{m}^3$

| Species           | Coal Combustion | Aged Sea Salt | Copper | Soil   |
|-------------------|-----------------|---------------|--------|--------|
| Ca                | 0.0120          | 0.0025        | 0.0027 | 0.1175 |
| Cl                | 0.0000          | 0.0149        | 0.0007 | 0.0000 |
| Cu                | 0.0001          | 0.0000        | 0.0025 | 0.0007 |
| EC                | 0.0421          | 0.0065        | 0.0000 | 0.0034 |
| Fe                | 0.0093          | 0.0015        | 0.0044 | 0.0975 |
| K                 | 0.0000          | 0.0000        | 0.0056 | 0.0270 |
| Mn                | 0.0004          | 0.0004        | 0.0000 | 0.0022 |
| Ni                | 0.0002          | 0.0000        | 0.0000 | 0.0000 |
| OC                | 0.6543          | 0.0197        | 0.1132 | 0.0000 |
| Pb                | 0.0000          | 0.0001        | 0.0030 | 0.0006 |
| PM <sub>2.5</sub> | 2.2371          | 0.0974        | 0.4186 | 1.8205 |
| S                 | 0.3134          | 0.0078        | 0.0462 | 0.0508 |
| Se                | 0.0001          | 0.0000        | 0.0002 | 0.0000 |
| Si                | 0.0411          | 0.0060        | 0.0051 | 0.3093 |
| Ti                | 0.0011          | 0.0001        | 0.0000 | 0.0081 |
| Zn                | 0.0005          | 0.0001        | 0.0017 | 0.0011 |
